# Supplementary material
Source: PubMed Central journal article supplement (PMC6818729)
Supplement: NIHMS1054076-supplement-supplemental.pdf [file NIHMS1054076-supplement-supplemental.pdf]

## Taxonomy of the *Sphaerostilbella broomeana*-group (Hypocreales, Ascomycota)

Mycological Progress

Kadri Põldmaa, Gerald Bills, David P. Lewis, Heidi Tamm

Corresponding author: Kadri Põldmaa, Department of Botany, Institute of Ecology and Earth Sciences, University of Tartu, Lai 40, EE-51005, Tartu, Estonia; email: hypomyc@ut.ee

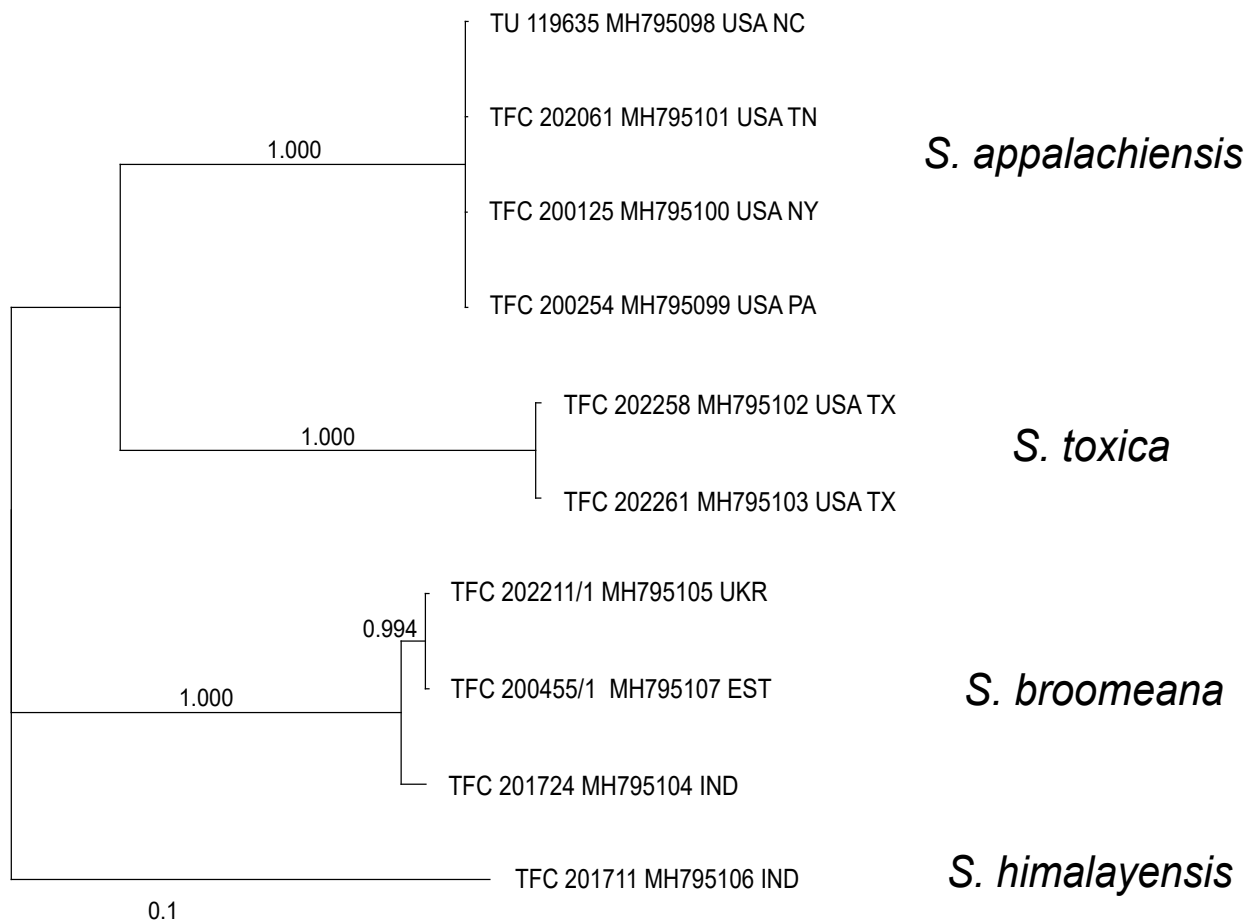

**Supplemental figure S1.** Bayesian phylogeny of the *Sphaerostilbella broomeana*-group, based on a datamatrix of TEF1 sequences including intron 5 (356 positions), intron 6 (68), exon 5 (139) and exon 6 (1001). Numbers on the branches indicate posterior probability values.
